# Supplementary material
Source: MDPI journal article supplement (https://www.mdpi.com/2673-8023/1/1/4)
Supplement: s1 [file s1]

## Enhanced electrochemical performance of $\text{Li}_4\text{Ti}_5\text{O}_{12}$ by niobium doping for pseudocapacitive applications

Jinka Chandrasekhar <sup>1</sup>, Merum Dhananjaya <sup>1</sup>, Obili M. Hussain <sup>1,\*</sup>, Alain Mauger <sup>2</sup>, and Christian M. Julien <sup>2,\*</sup>

<sup>1</sup> Thin film Laboratory, Department of Physics, Sri Venkateswara University, Tirupati 517502, India

<sup>2</sup> Institut de Minéralogie, de Physique des Matériaux et de Cosmochimie (IMPMC), Sorbonne Université, CNRS UMR 7590, 4 place Jussieu, 75005 Paris, France

\* Correspondence: [hussainsvu@gmail.com](mailto:hussainsvu@gmail.com) (O.M.H.); [christian.julien@sorbonne-universite.fr](mailto:christian.julien@sorbonne-universite.fr) (C.M.J.)

**Table S1.** The lattice parameters of the  $\text{Li}_4\text{Ti}_{5-x}\text{Nb}_x\text{O}_{12}$  samples synthesized by solid-state reaction at 900 °C.

| Doping (mol%) | Lattice parameter (Å) | Unit volume (Å <sup>3</sup> ) | Dislocation density (10 <sup>-10</sup> cm <sup>-2</sup> ) | Crystallite size (nm) |
|---------------|-----------------------|-------------------------------|-----------------------------------------------------------|-----------------------|
| 0             | 8.349(1)              | 582.00                        | 4.72                                                      | 46.0                  |
| 2             | 8.361(3)              | 584.48                        | 5.60                                                      | 42.2                  |
| 4             | 8.368(4)              | 585.95                        | 5.79                                                      | 41.5                  |
| 6             | 8.374(5)              | 587.39                        | 5.83                                                      | 41.3                  |
| 8             | 8.377(1)              | 587.87                        | 5.90                                                      | 41.1                  |
| 10            | 8.361(4)              | 584.58                        | 5.45                                                      | 42.1                  |

**Table S2.** Results of the Rietveld refinement for pristine LTO and 8%Nb-doped LTO.

| Composition           | $x=0.00$ | $x=0.08$ |
|-----------------------|----------|----------|
| Lattice parameter (Å) | 8.349(1) | 8.377(1) |
| Site occupancy        |          |          |
| 8a                    |          |          |
| Li1                   | 0.999(2) | 0.999(1) |
| Ti1                   | 0.001(1) | 0.001(2) |
| 16d                   |          |          |
| Ti2                   | 0.833(4) | 0.765(3) |
| Li2                   | 0.167(1) | 0.166(3) |
| Nb                    | -        | 0.079(1) |
| 32e                   |          |          |
| O                     | 1(-)     | 1(-)     |
| $R_{wp}$              | 0.112    | 0.103    |
| $R_p$                 | 0.073    | 0.066    |
| $\chi^2$              | 2.01     | 1.81     |

$R_{wp}$ : weighted profile residual,  $R_p$ : profile residual, and  $\chi^2$ : goodness of fit.

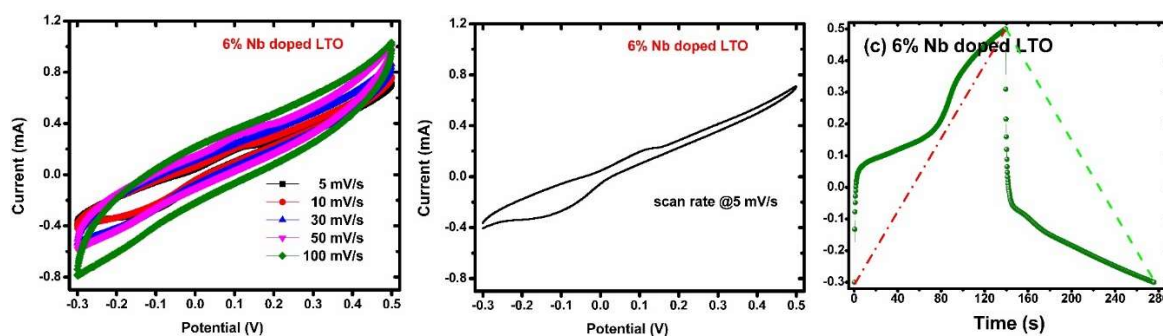

**Figure S1.** Electrochemical performance of the  $\text{Li}_4\text{Ti}_{4.94}\text{Nb}_{0.06}\text{O}_{12}$  sample: (a) CV curves of at various scan rates (5 – 100 mV s<sup>-1</sup>), (b) CV curve recorded at scan rate of 5 mV s<sup>-1</sup> showing the faradaic contribution, (c) GCD curves recorded at current density of 2 A g<sup>-1</sup> showing the faradaic voltage plateau.

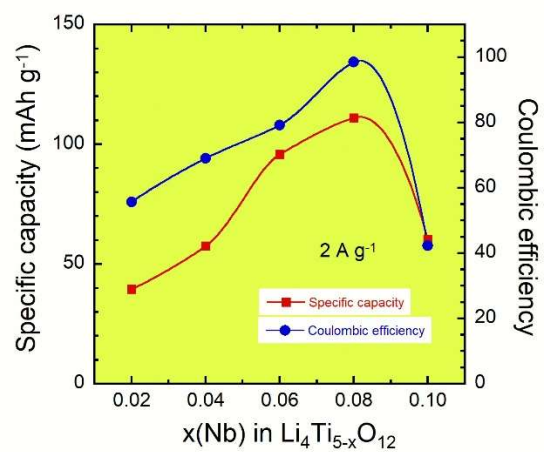

**Figure S2.** Composition dependence of the specific capacity and coulombic efficiency of  $\text{Li}_4\text{Ti}_{5-x}\text{Nb}_x\text{O}_{12}$  samples measured at current density of  $2 \text{ A g}^{-1}$ .
